# Supplementary material for: A set of nutrient limitations trigger yeast cell death in a nitrogen-dependent manner during wine alcoholic fermentation
Source: PLOS journal article supplement (doi:10.1371/journal.pone.0184838), 2017-09-18
Supplement: S1 (10.1371/journal.pone.0184838.s001) [file journal.pone.0184838.s001]

**S1 Table. Time of fermentation in hour where the T1, T2, T3 and T4 samples were harvested under the different nutrient starvation conditions.** Values of time are presented as mean of five sampling time  $\pm$  standard deviation.

|                | <b>T1</b><br>(20 $10^6$ cells/mL) | <b>T2</b><br>(12 g of CO <sub>2</sub> produced) | <b>T3</b><br>(40 g of CO <sub>2</sub> produced) | <b>T4</b><br>(75 g of CO <sub>2</sub> produced) |
|----------------|-----------------------------------|-------------------------------------------------|-------------------------------------------------|-------------------------------------------------|
| <b>N-</b>      | 19.27 $\pm$ 0.2                   | 47.64 $\pm$ 1.84                                | 138.29 $\pm$ 9.36                               | 281.71 $\pm$ 17.82                              |
| <b>N-/Erg-</b> | 19.26 $\pm$ 0.2                   | 47.97 $\pm$ 0.27                                | 145.08 $\pm$ 1.49                               | 291.32 $\pm$ 1.07                               |
| <b>N+/Ole-</b> | 19.58 $\pm$ 0.52                  | 30.80 $\pm$ 0.36                                | 54.27 $\pm$ 1.23                                | 105.58 $\pm$ 3.76                               |
| <b>N+/Erg-</b> | 19.15 $\pm$ 0.37                  | 30.39 $\pm$ 0.94                                | 55.39 $\pm$ 2.27                                | 97.98 $\pm$ 4.44                                |
| <b>N+/Pan-</b> | 19.40 $\pm$ 0.36                  | 34.62 $\pm$ 1.17                                | 83.33 $\pm$ 3.81                                | 300.84 $\pm$ 60.75                              |
| <b>N+/Nic-</b> | 18.59 $\pm$ 0.20                  | 35.60 $\pm$ 1.52                                | 104.44 $\pm$ 4.23                               | 399.31 $\pm$ 12.03                              |
